# Supplementary material for: Community-Based Health Education Led by Women’s Groups Significantly Improved Maternal Health Service Utilization in Southern Ethiopia: A Cluster Randomized Controlled Trial
Source: MDPI journal article supplement (doi:10.3390/healthcare12101045), 2024-05-18
Supplement: s1 [file s1]

**Table S1:** Description of maternal health care service use among women of reproductive age in the northern zone of Sidama region, Ethiopia, 2023 (N = 1,070)

| Variables                                            | Intervention group | Control group | Total      | P- value |
|------------------------------------------------------|--------------------|---------------|------------|----------|
|                                                      | N (%)              | N (%)         | N (%)      |          |
| At least one ANC                                     |                    |               |            | 0.001    |
| Utilized                                             | 489 (90.6)         | 355 (67.0)    | 844 (78.9) |          |
| Non-utilized                                         | 51 (9.4)           | 175 (33.0)    | 226 (21.1) |          |
| Number of ANC visits                                 |                    |               |            | 0.001    |
| 0                                                    | 51 (9.4)           | 175 (33.0)    | 226 (21.1) |          |
| 1-4                                                  | 264 (48.9)         | 221 (41.7)    | 485 (45.3) |          |
| 5-7                                                  | 21 (3.9)           | 18 (3.4)      | 39 (3.6)   |          |
| ≥8                                                   | 204 (37.8)         | 116 (21.9)    | 320 (29.9) |          |
| Type of health facility visited during ANC follow up |                    |               |            |          |
| Government hospital                                  | 204 (37.8)         | 75 (14.2)     | 279 (26.1) | 0.001    |
| Health Centre                                        | 397 (73.5)         | 349 (65.8)    | 621 (58.0) | 0.006    |
| Reasons to prefer the above-stated health facilities |                    |               |            |          |
| Close to my house                                    | 401 (74.3)         | 251 (47.4)    | 652 (60.9) | 0.001    |
| Competent health worker                              | 193 (35.7)         | 185 (34.9)    | 378 (35.3) | 0.775    |
| Plan to give birth in HF                             |                    |               |            |          |
| No                                                   | 104 (19.3)         | 229 (43.2)    | 333 (31.1) | 0.001    |
| Yes                                                  | 436 (80.7)         | 301 (56.8)    | 737 (68.9) |          |

|                                              |            |            |            |       |
|----------------------------------------------|------------|------------|------------|-------|
| Place of delivery                            |            |            |            | 0.001 |
| Home                                         | 84 (15.6)  | 203 (38.3) | 287 (26.8) |       |
| Health facility                              | 456 (84.4) | 327 (61.7) | 783 (73.2) |       |
| Mode of delivery                             |            |            |            | 0.927 |
| SVD                                          | 454 (84.1) | 445 (84.0) | 899 (84.0) |       |
| Instrumental                                 | 62 (11.5)  | 59 (11.1)  | 121 (11.3) |       |
| C/S                                          | 24 (4.4)   | 26 (4.9)   | 50 (4.7)   |       |
| Type of providers attended during childbirth |            |            |            |       |
| Doctor                                       | 96 (17.8)  | 40 (7.5)   | 136 (12.7) | 0.001 |
| Nurse                                        | 145 (26.9) | 66 (12.5)  | 211 (19.7) | 0.001 |
| Midwife                                      | 395 (73.1) | 324 (61.1) | 719 (67.2) | 0.001 |
| Health officer                               | 23 (4.3)   | 17 (3.2)   | 40 (3.7)   | 0.365 |
| TBA                                          | 66 (12.2)  | 145 (27.4) | 211 (19.7) | 0.001 |
| At least one PNC                             |            |            |            | 0.001 |
| Utilized                                     | 353 (65.4) | 276 (52.1) | 629 (58.8) |       |
| Non-utilized                                 | 187 (34.6) | 254 (47.9) | 441 (41.2) |       |
| Number of PNC visits                         |            |            |            | 0.001 |
| 0                                            | 353 (65.4) | 276 (52.1) | 629 (58.8) |       |
| 1-3                                          | 239 (44.3) | 195 (36.8) | 434 (40.6) |       |
| ≥4                                           | 114 (21.1) | 81 (15.3)  | 195 (18.2) |       |
| Other services during PNC use                |            |            |            |       |
| Child vaccination                            | 239 (67.7) | 167 (60.5) | 406 (64.5) | 0.061 |

|                                 |            |            |            |       |
|---------------------------------|------------|------------|------------|-------|
| Family planning                 | 316 (89.5) | 220 (79.7) | 536 (85.2) | 0.001 |
| Counseling about breast feeding | 283 (80.2) | 178 (64.5) | 461 (73.3) | 0.001 |

**Table S2:** Multilevel modified Poisson regression analysis result of a random intercept model for maternal health service use variation at cluster level in north zone of Sidama region, Ethiopia, 2023 (N = 1,070)

| Measure of variation                                | Model 1 (95% CI)     | Model 2 (95% CI)      | Model 3 (95% CI)     | Model 4 (95% CI)      |
|-----------------------------------------------------|----------------------|-----------------------|----------------------|-----------------------|
| <b>ANC related information</b>                      |                      |                       |                      |                       |
| Variance of intercept                               | 0.01 (0.001, 0.11)   | 0.002 (0.001, 1257.5) | 0.009 (0.001, 0.005) | 0.005 (0.001, 0.002)  |
| ICC percentage                                      | 22.35 (12.38-36.97)  |                       |                      |                       |
| Model fitness                                       |                      |                       |                      |                       |
| Log-likelihood ratio                                | -1043.49             | -1028.08              | -1033.27             | -1019.96              |
| AIC                                                 | 2090.99              | 2092.17               | 2088.54              | 2083.92               |
| BIC                                                 | 2100.94              | 2181.73               | 2108.39              | 2093.38               |
| <b>Health facility delivery related information</b> |                      |                       |                      |                       |
| Variance of intercept                               | 0.01 (0.01, 0.05)    | 0.02 (0.008, 0.961)   | 0.009 (0.008, 0.017) | 0.001 (0.0001, 0.004) |
| ICC percentage                                      | 21.88 (11.40, 37.87) |                       |                      |                       |
| Model fitness                                       |                      |                       |                      |                       |
| Log-likelihood ratio                                | -1026.57             | -1009.04              | -1016.46             | -1001.38              |
| AIC                                                 | 2057.14              | 2054.08               | 2054.93              | 2046.76               |

|                                           |                     |                     |                     |                     |
|-------------------------------------------|---------------------|---------------------|---------------------|---------------------|
| BIC                                       | 2067.09             | 2143.64             | 2074.78             | 2056.22             |
| <b>Postnatal care related information</b> |                     |                     |                     |                     |
| Variance of intercept                     | 0.03 (0.006, 0.108) | 0.021 (0.03, 0.113) | 0.02 (0.001, 0.115) | 0.01 (0.001, 0.134) |
| ICC percentage                            | 10.76 (5.26, 20.75) |                     |                     |                     |
| Model fitness                             |                     |                     |                     |                     |
| Log-likelihood ratio                      | -961.16             | -933.85             | -958.22             | -932.21             |
| AIC                                       | 1926.32             | 1931.71             | 1928.45             | 1918.43             |
| BIC                                       | 1936.27             | 2028.14             | 1958.30             | 1932.76             |

ICC: Intra-class correlation coefficient; AIC: Akaike information criteria; BIC: Bayesian information criteria; CI: confidence interval.

### **Effect modification result of ANC**

We entered the interaction terms in the final model for women's occupation and intervention status, husband occupation and intervention status, mass media use and intervention status, wealth index and intervention status, model family training and intervention status, place of residence and intervention status, cluster-level mass media use and intervention status, and cluster-level poverty and intervention status to see if women's occupation, husband occupation, mass media use, wealth index, model family training, place of residence, cluster-level mass media use, and cluster-level poverty modifies the effect of intervention. It is implied that there was no significant effect modification because none of the interaction terms were statistically significant.

### **Effect modification result of HFD**

We entered the interaction terms in the final model for women's occupation and intervention status, husband occupation and intervention status, mass media use and intervention status, wealth index and intervention status, model family training and intervention status, place of residence and intervention status, cluster-level mass media use and intervention status, and cluster-level

poverty and intervention status to see if women's occupation, husband occupation, mass media use, wealth index, model family training, place of residence, cluster-level mass media use, and cluster-level poverty modifies the effect of intervention. None of the interaction terms was statistically significant, implying the absence of a significant effect modification.
