# Supplementary material for: Community-Based Health Education Led by Women’s Groups Significantly Improved Maternal Health Service Utilization in Southern Ethiopia: A Cluster Randomized Controlled Trial
Source: MDPI journal article supplement (doi:10.3390/healthcare12101045), 2024-05-18
Supplement: s1 [file s1]

CONSORT 2010 checklist of information to include when reporting a randomised trial\*

| Section/Topic             | Item No | Checklist item                                                                                                                        | Reported on page No |
|---------------------------|---------|---------------------------------------------------------------------------------------------------------------------------------------|---------------------|
| <b>Title and abstract</b> |         |                                                                                                                                       |                     |
|                           | 1a      | Identification as a randomised trial in the title                                                                                     |                     |
|                           | 1b      | Structured summary of trial design, methods, results, and conclusions (for specific guidance see CONSORT for abstracts [1, 2])        | 2                   |
| <b>Introduction</b>       |         |                                                                                                                                       |                     |
| Background and objectives | 2a      | Scientific background and explanation of rationale                                                                                    |                     |
|                           | 2b      | Specific objectives or hypotheses                                                                                                     | 4-6                 |
| <b>Methods</b>            |         |                                                                                                                                       |                     |
| Trial design              | 3a      | Description of trial design (such as parallel, factorial) including allocation ratio                                                  |                     |
|                           | 3b      | Important changes to methods after trial commencement (such as eligibility criteria), with reasons                                    | 7                   |
| Participants              | 4a      | Eligibility criteria for participants                                                                                                 |                     |
|                           | 4b      | Settings and locations where the data were collected                                                                                  |                     |
| Interventions             | 5       | The interventions for each group with sufficient details to allow replication, including how and when they were actually administered | 7                   |
| Outcomes                  | 6a      | Completely defined pre-specified primary and secondary outcome measures, including how and when they were assessed                    | 12 and 13           |
|                           | 6b      | Any changes to trial outcomes after the trial commenced, with reasons                                                                 | N/A                 |
| Sample size               | 7a      | How sample size was determined                                                                                                        | 8                   |
|                           | 7b      | When applicable, explanation of any interim analyses and stopping guidelines                                                          | N/A                 |
| <b>Randomisation:</b>     |         |                                                                                                                                       |                     |
| Sequence generation       | 8a      | Method used to generate the random allocation sequence                                                                                | 9                   |
|                           | 8b      | Type of randomisation; details of any restriction (such as blocking and block size)                                                   |                     |
| Allocation                | 9       | Mechanism used to implement the random allocation sequence (such as sequentially numbered                                             |                     |

|                                                      |     |                                                                                                                                                   |           |
|------------------------------------------------------|-----|---------------------------------------------------------------------------------------------------------------------------------------------------|-----------|
| concealment mechanism                                |     | containers), describing any steps taken to conceal the sequence until interventions were assigned                                                 |           |
| Implementation                                       | 10  | Who generated the random allocation sequence, who enrolled participants, and who assigned participants to interventions                           | 9         |
| Blinding                                             | 11a | If done, who was blinded after assignment to interventions (for example, participants, care providers, those assessing outcomes) and how          | 9         |
|                                                      | 11b | If relevant, description of the similarity of interventions                                                                                       | 12        |
| Statistical methods                                  | 12a | Statistical methods used to compare groups for primary and secondary outcomes                                                                     |           |
|                                                      | 12b | Methods for additional analyses, such as subgroup analyses and adjusted analyses                                                                  |           |
| <b>Results</b>                                       |     |                                                                                                                                                   |           |
| Participant flow (a diagram is strongly recommended) | 13a | For each group, the numbers of participants who were randomly assigned, received intended treatment, and were analysed for the primary outcome    | 10 and 18 |
|                                                      | 13b | For each group, losses and exclusions after randomisation, together with reasons                                                                  | 18        |
| Recruitment                                          | 14a | Dates defining the periods of recruitment and follow-up                                                                                           |           |
|                                                      | 14b | Why the trial ended or was stopped                                                                                                                | 18        |
| Baseline data                                        | 15  | A table showing baseline demographic and clinical characteristics for each group                                                                  | 20-24     |
| Numbers analysed                                     | 16  | For each group, number of participants (denominator) included in each analysis and whether the analysis was by original assigned groups           |           |
| Outcomes and estimation                              | 17a | For each primary and secondary outcome, results for each group, and the estimated effect size and its precision (such as 95% confidence interval) | 24-29     |
|                                                      | 17b | For binary outcomes, presentation of both absolute and relative effect sizes is recommended                                                       |           |
| Ancillary analyses                                   | 18  | Results of any other analyses performed, including subgroup analyses and adjusted analyses, distinguishing pre-specified from exploratory         | 24-29     |
| Harms                                                | 19  | All important harms or unintended effects in each group (for specific guidance see CONSORT for harms <sup>28</sup> )                              | 17        |
| <b>Discussion</b>                                    |     |                                                                                                                                                   |           |
| Limitations                                          | 20  | Trial limitations, addressing sources of potential bias, imprecision, and, if relevant, multiplicity of analyses                                  | 34        |
| Generalisability                                     | 21  | Generalisability (external validity, applicability) of the trial findings                                                                         | 34-35     |

|                          |    |                                                                                                               |                                                         |
|--------------------------|----|---------------------------------------------------------------------------------------------------------------|---------------------------------------------------------|
| Interpretation           | 22 | Interpretation consistent with results, balancing benefits and harms, and considering other relevant evidence | 30-33                                                   |
| <b>Other information</b> |    |                                                                                                               |                                                         |
| Registration             | 23 | Registration number and name of trial registry                                                                | ClinicalTrials.gov with registration number NCT05865873 |
| Protocol                 | 24 | Where the full trial protocol can be accessed, if available                                                   |                                                         |
| Funding                  | 25 | Sources of funding and other support (such as supply of drugs), role of funders                               | Hawassa University and Sidama region president office   |

---

\*We strongly recommend reading this statement in conjunction with the CONSORT 2010 Explanation and Elaboration [3] for important clarifications on all the items. If relevant, we also recommend reading CONSORT extensions for cluster randomised trials, [4] non-inferiority and equivalence trials [5], non-pharmacological treatments [6], herbal interventions [7], and pragmatic trials [8]. Additional extensions are forthcoming: for those and for up to date references relevant to this checklist, see [www.consort-statement.org](http://www.consort-statement.org).

## References

1. Hopewell S, Clarke M, Moher D, Wager E, Middleton P, Altman DG, et al. CONSORT for reporting randomised trials in journal and conference abstracts. *Lancet* 2008;371:281-3.
2. Hopewell S, Clarke M, Moher D, Wager E, Middleton P, Altman DG, et al. CONSORT for reporting randomized controlled trials in journal and conference abstracts: explanation and elaboration. *PLoS Med* 2008;5:e20.

3. Moher D, Hopewell S, Schulz KF, Montori V, Gøtzsche PC, Devereaux PJ, et al. CONSORT 2010 Explanation and Elaboration: updated guidelines for reporting parallel group randomised trials. *BMJ* 2010;340:c869.
4. Campbell MK, Elbourne DR, Altman DG. CONSORT statement: extension to cluster randomised trials. *BMJ* 2004;328:702-8.
5. Piaggio G, Elbourne DR, Altman DG, Pocock SJ, Evans SJ. Reporting of noninferiority and equivalence randomized trials: an extension of the CONSORT statement. *JAMA* 2006;295:1152-60.
6. Boutron I, Moher D, Altman DG, Schulz KF, Ravaud P. Extending the CONSORT statement to randomized trials of nonpharmacologic treatment: explanation and elaboration. *Ann Intern Med* 2008;148:295-309.
7. Gagnier JJ, Boon H, Rochon P, Moher D, Barnes J, Bombardier C. Reporting randomized, controlled trials of herbal interventions: an elaborated CONSORT statement. *Ann Intern Med* 2006;144:364-7.
8. Zwarenstein M, Treweek S, Gagnier JJ, Altman DG, Tunis S, Haynes B, et al. Improving the reporting of pragmatic trials: an extension of the CONSORT statement. *BMJ* 2008;337:a2390
